# Supplementary material for: Structural properties of Sb2S3 under pressure: evidence of an electronic topological transition
Source: PubMed Central journal article supplement (PMC4822153; doi:10.1038/srep24246), 2016-04-06
Supplement: srep24246-s1.pdf [file srep24246-s1.pdf]

# **Structural properties of $\text{Sb}_2\text{S}_3$ under pressure: evidence of an electronic topological transition**

Ilias Efthimiopoulos<sup>1,\*†</sup>, Cienna Buchan<sup>1</sup>, and Yuejian Wang<sup>1,\*</sup>

<sup>1</sup>*Department of Physics, Oakland University, Rochester, MI, 48309, USA*

\*Corresponding authors: [iliefthi@gmail.com](mailto:iliefthi@gmail.com), [ywang235@oakland.edu](mailto:ywang235@oakland.edu)

†Current address: Helmholtz-Zentrum Potsdam, Deutsches GeoForschungsZentrum GFZ, Section 4.3, Telegrafenberg, 14473, Potsdam, Germany

## **Supplementary Information**

**Table S1:** Lattice parameters for the *Pnma* phase of  $\text{Sb}_2\text{S}_3$  at various pressures.

| <i>P</i> (GPa)   | <i>a</i> (Å) | <i>b</i> (Å) | <i>c</i> (Å) | <i>V</i> (Å <sup>3</sup> ) |
|------------------|--------------|--------------|--------------|----------------------------|
| 10 <sup>-4</sup> | 11.3045(2)   | 3.8411(1)    | 11.2386(2)   | 488.0                      |
| 0.63             | 11.2014(2)   | 3.8268(1)    | 11.1525(2)   | 478.1                      |
| 1.4              | 11.0658(2)   | 3.8127(1)    | 11.0555(2)   | 466.4                      |
| 2.6              | 10.8969(2)   | 3.7977(1)    | 10.9316(2)   | 452.4                      |
| 4.8              | 10.7277(2)   | 3.7731(1)    | 10.7843(2)   | 436.5                      |
| 6.3              | 10.6986(2)   | 3.7636(1)    | 10.7708(2)   | 433.7                      |
| 7.5              | 10.6316(2)   | 3.7502(1)    | 10.7065(2)   | 426.9                      |
| 8.8              | 10.5625(2)   | 3.7366(1)    | 10.6373(2)   | 419.8                      |
| 10               | 10.4935(3)   | 3.7235(1)    | 10.5467(3)   | 412.1                      |
| 11.8             | 10.4068(3)   | 3.7067(1)    | 10.4566(3)   | 403.4                      |
| 13.2             | 10.3897(3)   | 3.6946(1)    | 10.3704(3)   | 398.1                      |
| 15.3             | 10.3069(3)   | 3.6823(1)    | 10.2419(3)   | 388.7                      |
| 17.2             | 10.2412(3)   | 3.6756(2)    | 10.1365(3)   | 381.6                      |
| 20.2             | 10.1479(4)   | 3.6606(2)    | 10.0245(4)   | 372.4                      |

**Table S2:** Atomic coordinates for all ions in the  $\text{Sb}_2\text{S}_3$  *Pnma* unit cell at various pressures.

| <i>P</i> (GPa)   | Sb(1)-x   | Sb(1)-z   | Sb(2)-x   | Sb(2)-z   | S(1)-x    | S(1)-z    | S(2)-x    | S(2)-z    | S(3)-x    | S(3)-z    |
|------------------|-----------|-----------|-----------|-----------|-----------|-----------|-----------|-----------|-----------|-----------|
| 10 <sup>-4</sup> | 0.0258(1) | 0.6757(1) | 0.3461(2) | 0.4626(2) | 0.0558(5) | 0.1217(5) | 0.3772(5) | 0.0495(5) | 0.2024(5) | 0.7962(5) |
| 0.63             | 0.0244(1) | 0.6759(1) | 0.3488(2) | 0.4632(2) | 0.0501(5) | 0.1190(5) | 0.3771(5) | 0.0595(5) | 0.2060(5) | 0.8023(5) |
| 1.4              | 0.0233(1) | 0.6752(1) | 0.3484(2) | 0.4636(2) | 0.0506(5) | 0.1228(5) | 0.3727(5) | 0.0533(5) | 0.2064(5) | 0.8029(5) |
| 2.6              | 0.0185(1) | 0.6752(1) | 0.3437(2) | 0.4635(2) | 0.0607(5) | 0.1180(5) | 0.3707(5) | 0.0451(5) | 0.2091(5) | 0.8004(5) |
| 4.8              | 0.0160(1) | 0.6715(1) | 0.3436(2) | 0.4671(2) | 0.0479(5) | 0.1260(5) | 0.3811(5) | 0.0658(5) | 0.2055(5) | 0.7913(5) |
| 6.3              | 0.0171(1) | 0.6726(1) | 0.3372(2) | 0.4668(2) | 0.0522(5) | 0.1181(5) | 0.3997(5) | 0.0389(5) | 0.2077(5) | 0.7898(5) |
| 7.5              | 0.0122(1) | 0.6732(1) | 0.3368(2) | 0.4654(2) | 0.0603(5) | 0.1139(5) | 0.3906(5) | 0.0501(5) | 0.2134(5) | 0.7817(5) |
| 8.8              | 0.0093(5) | 0.6705(5) | 0.3382(3) | 0.4651(3) | 0.073(1)  | 0.124(1)  | 0.390(1)  | 0.059(1)  | 0.208(1)  | 0.770(1)  |

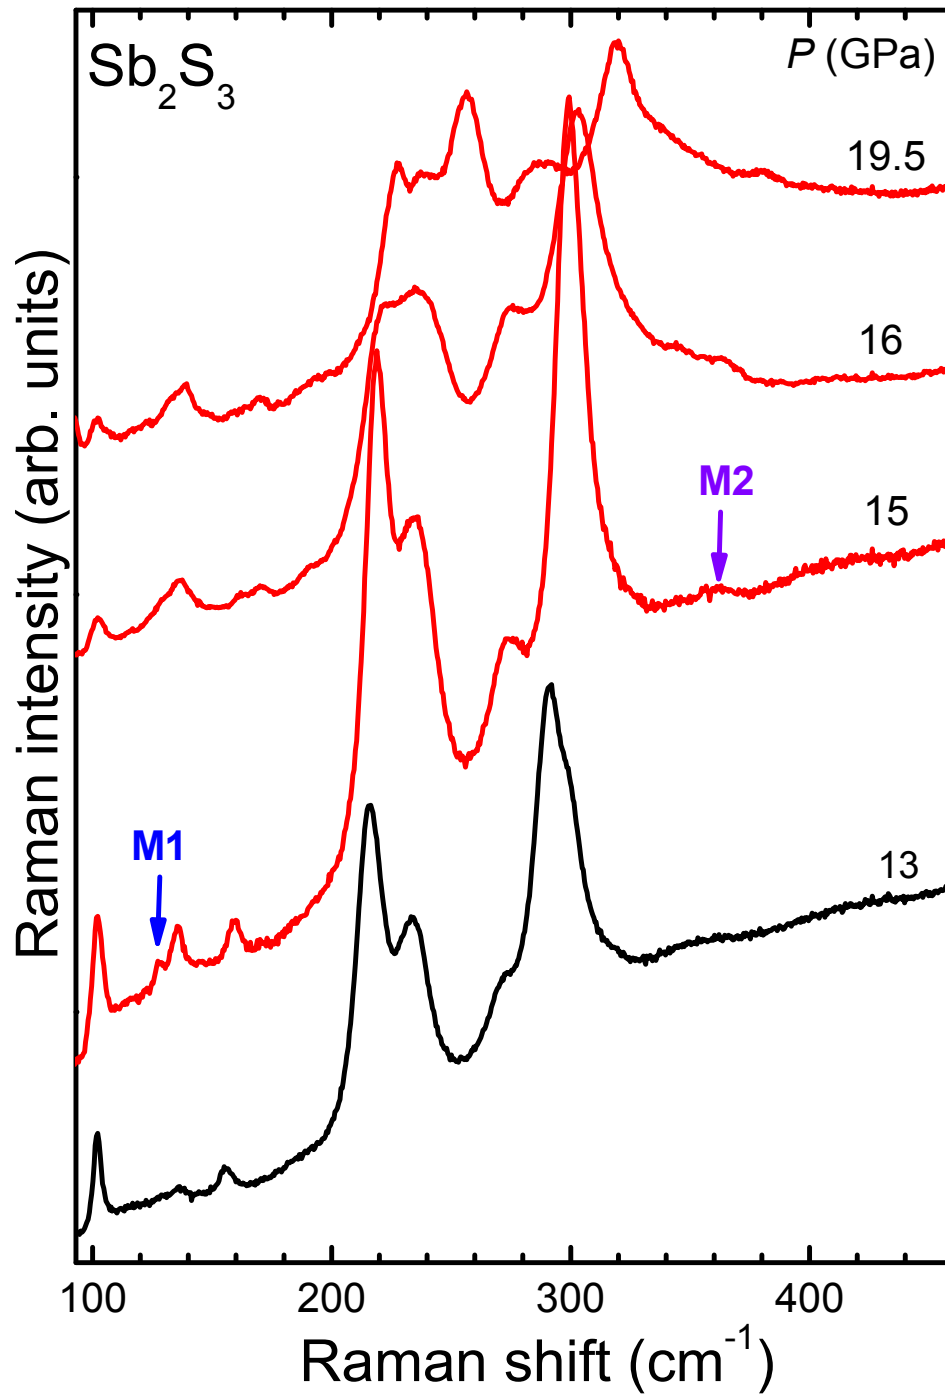

**Figure S1:** Raman spectra of  $\text{Sb}_2\text{S}_3$  between 13-20 GPa ( $\lambda = 532$  nm,  $T = 300$  K). The “new” Raman features M1 and M2 are denoted with arrows.

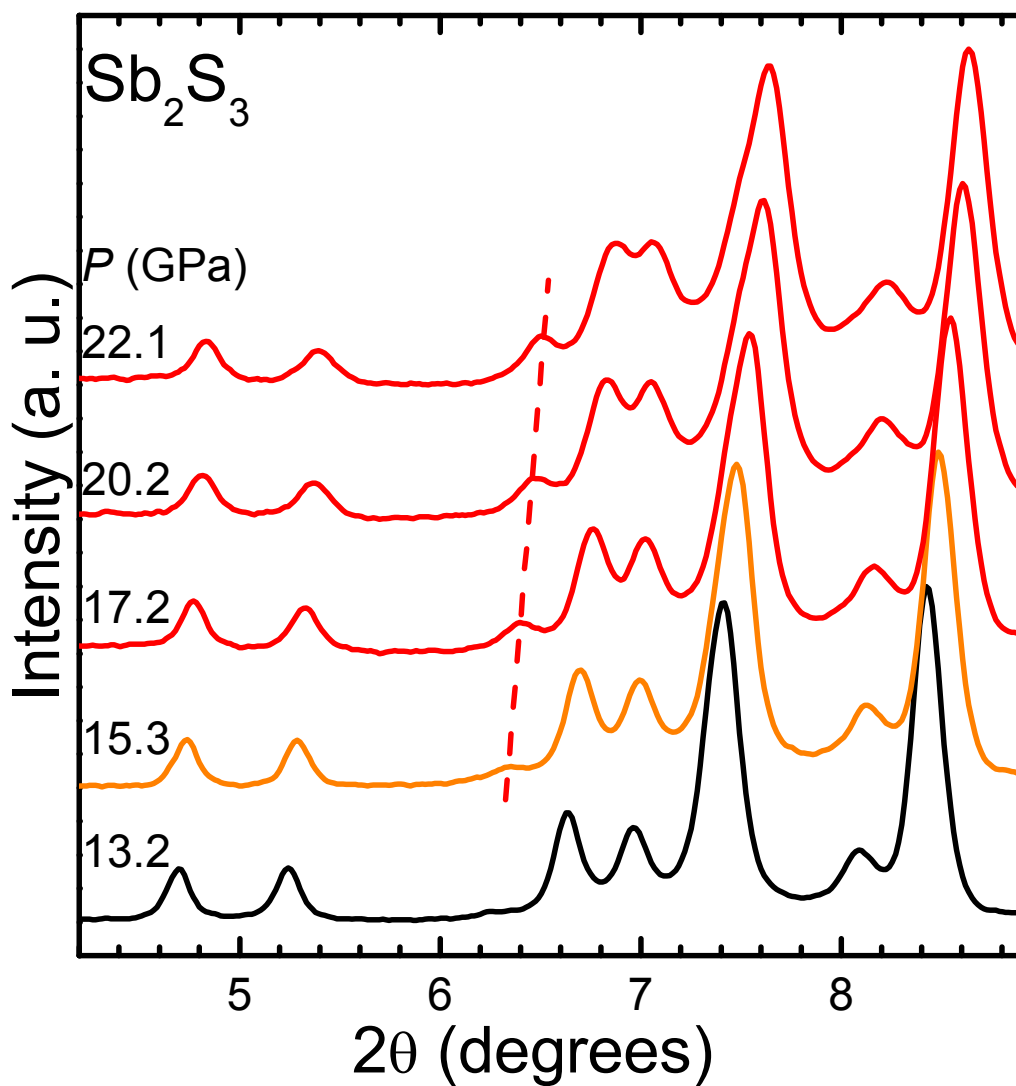

**Figure S2:** Expanded view of the XRD patterns of  $\text{Sb}_2\text{S}_3$  between 13-22 GPa within the 4-9°  $2\theta$  range.

The red dashed line marks the evolution of the new Bragg feature at  $2\theta \approx 6.6^\circ$ .

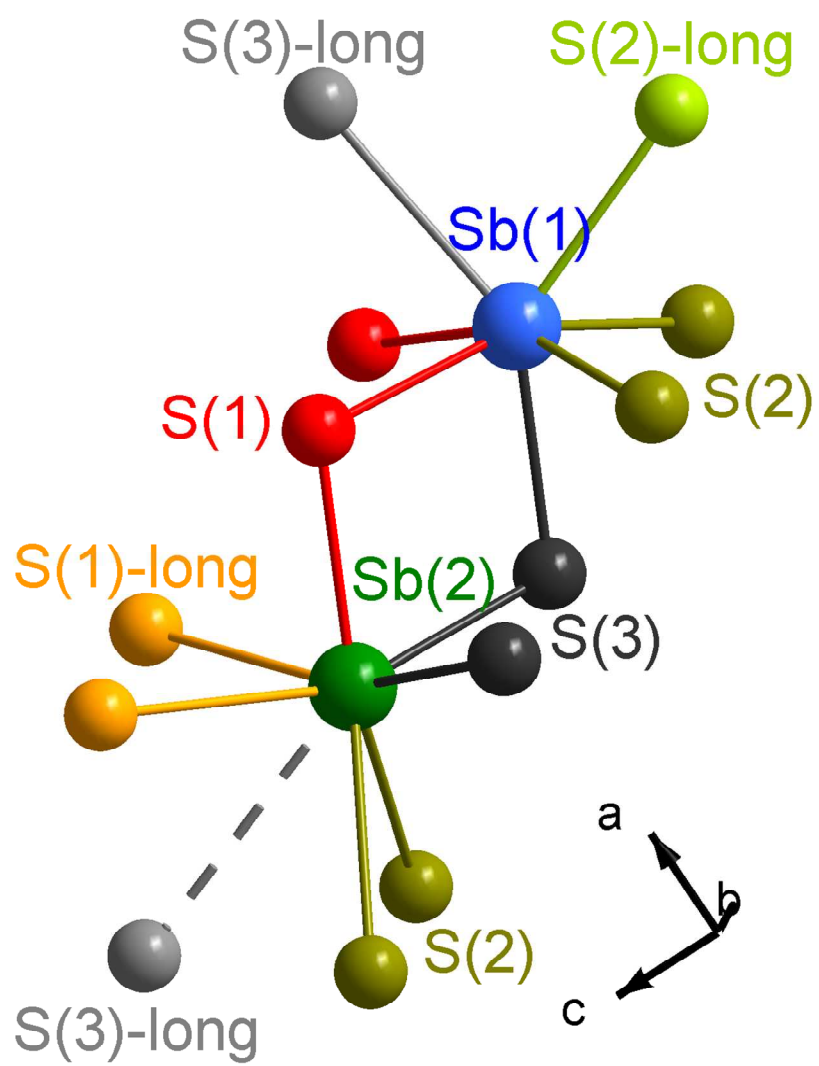

**Figure S3:** Sketch of the local coordination environment around the two distinct Sb(1) and Sb(2) ions of the  $Sb_2S_3$   $Pnma$  phase.
